# Supplementary material
Source: Springer Nature journal article supplement (https://www.springermedizin.de/resource/supplementary/12913_2014_3437_MOESM3_ESM.pdf/9532814)
Supplement: MOESM3 [file 9532814]

Recruitment into the WSD trial

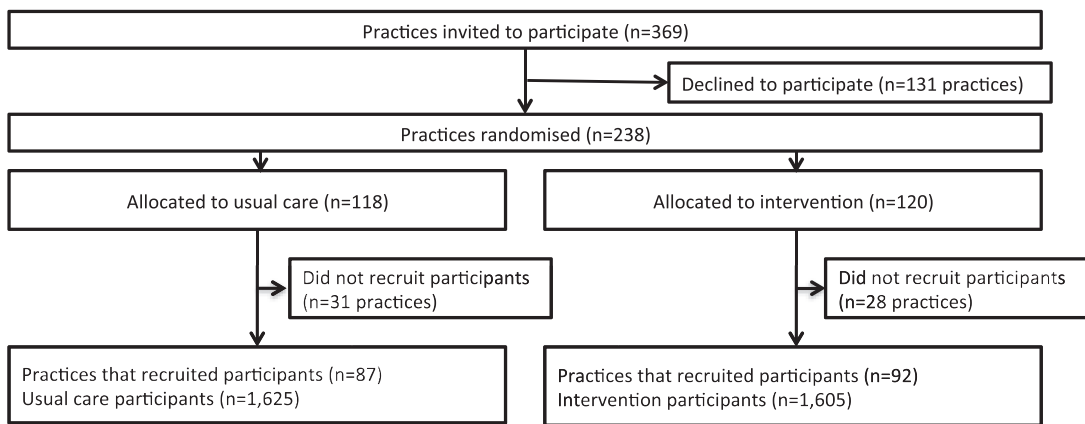

Analysis for the current study

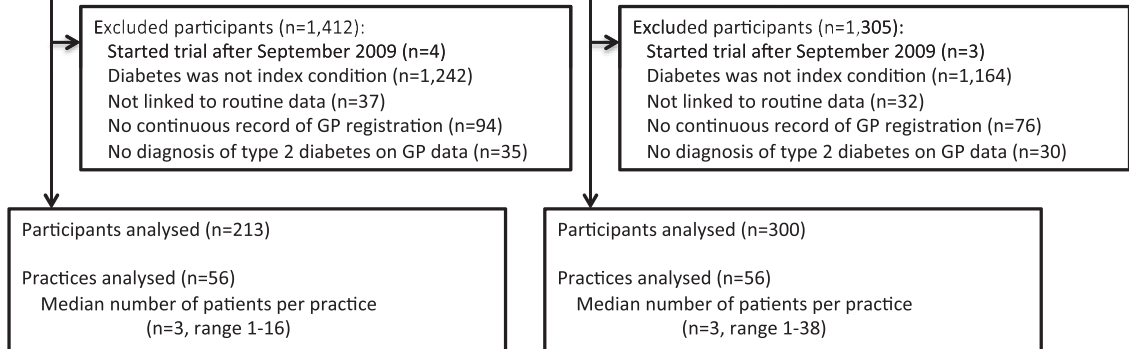

Note: For more information about trial recruitment, see the primary study.(14) Across all three targeted chronic conditions, the sites assessed 15,171 patients for eligibility and sent data sharing consent forms; 5,279 (34.8%) of these patients agreed to a home visit.
